# Supplementary material
Source: PubMed Central journal article supplement (PMC5931119)
Supplement: jciinsight-3-98296-s001.pdf [file jciinsight-3-98296-s001.pdf]

## **Supplemental appendix**

**For the manuscript entitled “Activating PRKACB somatic mutation in cortisol producing adenomas”** by Stéphanie Espiard, Matthias J. Knape, Kerstin Bathon, Guillaume Assié, Marthe Rizk-Rabin, Simon Faillot, Windy Luscap-Rondof, Daniel Abid, Laurence Guignat, Davide Calebiro, Friedrich W. Herberg, Constantine A. Stratakis, Jérôme Bertherat

## **Supplemental Methods**

### **Genetic testing**

Exome DNA was captured using the SureSelectXT Human All Exon version 4 Kit (Agilent), following the manufacturer's protocol, and then sequenced on a pair of SOLiD 5500xl flowchips (12 lanes) as pair-end sequencing reads (75 plus 35 bp) on a 5500 SOLiD sequencer (Life Technologies). Colour space reads were mapped to the GRCh37/hg19 reference genome using LifeScope software version 2.5.1 (Life Technologies). Variants were identified using GATK version 2.1 (Genome Analysis Toolkit, Broad Institute) along with Picard tools version 1.77 or LifeScope version 2.5.1 (Life Technologies) and annotated with ANNOVAR version 2012Mar08 (supplemental table 1).

### **DNA constructs**

For PKA activity experiments, the wild-type and mutant DNA constructs were obtained from Blue Heron. The *PRKACB* sequence wild-type (WT) (NM\_002731) and mutant were introduced into the pCMV6-AC-DDK expression vector containing a C-terminal DDK-tag (Blue Heron PS100005). The same coding sequence (WT) was cloned into the pGFP-C3 (N-terminal GFP tag, Perkin Elmer) and pET30 vector (Novagen). The S54L mutation was introduced by site-directed mutagenesis using the QuickChange mutagenesis kit (Stratagene) with specific primer pairs (5'-GGAACAGGTTTATTTGGAAGAG-3'). Successful subcloning and mutagenesis was verified by Sanger sequencing. For the holoenzyme formation experiment using SPR the sequence encoding the human regulatory (R) subunit RI $\alpha$  of PKA was introduced into the expression vector pGEX-KG (N-terminal GST tag).

## Cell culture

Cell lines were obtained from American Type Culture Collection (ATCC). Human embryonic kidney cells HEK293 cells were cultured in DMEM GlutaMax medium containing 10% fetal bovine serum. Mediums were supplemented with penicillin (100 U/mL) and streptomycin (100 µg/mL).

Bioluminescence Resonance Energy Transfer (BRET) assay were performed in HEK293 cells (DSMZ, Braunschweig, Germany) co-transfected with plasmids (pGFP-C and pRluc8-N) encoding the human PKA catalytic (C) isoforms GFP-Cβ1, GFP-Cβ1S54L and the human PKA regulatory isoform RIα-Rluc8, RIβ-Rluc8, RIIα-Rluc8, or RIIβ-Rluc8 respectively, allowing the analysis of defined PKA holoenzymes (1). HEK293 cells were seeded in 96-well Nunc Nunclon plates (Thermo Scientific) at a density of  $2 \times 10^4$  cells/well and cultured in DMEM with high glucose (GE Healthcare) supplemented with 10% fetal calf serum gold (PAA Laboratories) at 37 °C and 5% CO<sub>2</sub>. The following day, cells were transfected.

For the *in vitro* PKA activity assay, HEK293 cells were seeded in 6-well plates at a density of  $0.25 \times 10^6$  cells/well and allowed to grow for 24 h, before transfection with Effectene (Qiagen) according to the manufacturer's instructions. Since protein expression of S54L-Cβ was lower *in cellulae* than the WT-Cβ, we increased the transfected amount of the catalytic subunit vectors while keeping the regulatory subunit constant to obtain comparable Cβ expression.

## Expression, purification of recombinant PKA-Cβ1 and GST-PKA-RIα

Recombinant expression of PKA-C in *E. coli* and purification by IP20 affinity chromatography was performed as described earlier (2, 3). For this, pET30-PKA-Cβ1 (encoding the human PKA catalytic subunit β1) was transformed and expressed in *E. coli* BL21(DE3). For expression of PKA-Cβ1 S54L, pET30-PKA-Cβ1 S54L was co-transformed with the plasmid pGEX-KG-PDK1 coding for the putative activator kinase of PKA, 3-phosphoinositide-dependent protein kinase-1 (PDK1). (Auto)phosphorylation of the activation loop and of the turn motif was verified using site-specific antibodies.

Human PKA-R1 $\alpha$  (non-tagged and GST-tagged) was expressed in *E. coli* BL21(DE3) RIL cells and purified using a cAMP resin (Sp-8-AEA-cAMPS agarose, A008, Biolog) to obtain cAMP-free R subunit as described earlier (4).

### **Immunohistochemistry**

Sections were deparaffinized in xylene and rehydrated through 100% ethanol. For antigen unmasking, the slides were incubated in antigen unmasking solution (Vector) a citrate buffer pH6 for 20 min at 99° C in a microwave (Biocare medical, Eurobio). Endogenous peroxidases were inhibited by incubation in 3% hydrogen peroxide (Sigma-Aldrich, St. Louis, MO) in water for 5 min. Slides were incubated with 10% normal goat serum (life technologies) for 30min to block non specific binding sites, than primary antibodies **PRKACB (1:500)** (sc-904 Santa Cruz®) and PRKACA (610981 BD Biosciences®) (1:50) were incubated overnight at 4° C. Sections were washed than using Vectastain ABC working solutions (Vector) sections were incubated with biotinylated second conjugated antibodies for 1H, and than vectastain ABC reagent for 30min. Slides were washed and antigen were revealed with diaminobenzidin (peroxydase substrate Kit DAB ,Vector) for 5-10min and counterstained with hematoxilin (Sigma®). Slides were scanned by Lamina (Perkin –Elmer) and viewed by Panoramic Viewer software.

## References

1. Schwede F et al. Rp-cAMPS Prodrugs Reveal the cAMP Dependence of First-Phase Glucose-Stimulated Insulin Secretion. *Mol. Endocrinol. Baltim. Md* 2015;vol. 29(no. 7):p. 988-1005.
2. Knape MJ et al. Divalent Metal Ions  $Mg^{2+}$  and  $Ca^{2+}$  Have Distinct Effects on Protein Kinase A Activity and Regulation. *ACS Chem. Biol.* 2015;vol. 10(no. 10):p. 2303-2315.
3. Olsen SR, Uhler MD. Affinity purification of the C alpha and C beta isoforms of the catalytic subunit of cAMP-dependent protein kinase. *J. Biol. Chem.* 1989;vol. 264(no. 31):p. 18662-18666.
4. Bertinetti D et al. Chemical tools selectively target components of the PKA system. *BMC Chem. Biol.* 2009;vol. 9:p. 3.

**Supplemental table 1: variants list found after filtering in the 6 CPA**

| Sample | Gene     | Transcript   | Function   | cDNA level     | Protein level | ExAC_Freq | Depth | % Var |
|--------|----------|--------------|------------|----------------|---------------|-----------|-------|-------|
| Ad1    | PRKACB   | NM_002731    | missense   | c.C161T        | p.S54L        | NA        | 49    | 27    |
| Ad1    | ARHGAP5  | NM_001030055 | missense   | c.G1439A       | p.R480Q       | 8.237e-06 | 70    | 16    |
| Ad1    | CABIN1   | NM_001201429 | missense   | c.A1142G       | p.D381G       | NA        | 64    | 33    |
| Ad1    | E2F5     | NM_001083588 | nonsense   | c.C323G        | p.S108X       | NA        | 13    | 23    |
| Ad1    | HCFC1    | NM_005334    | missense   | c.G98C         | p.R33P        | NA        | 13    | 31    |
| Ad1    | ITIH4    | NM_001166449 | missense   | c.C2108G       | p.S703C       | NA        | 12    | 25    |
| Ad1    | ITIH4    | NM_001166449 | missense   | c.C2098A       | p.Q700K       | NA        | 8     | 38    |
| Ad1    | KIF1A    | NM_001244008 | missense   | c.G2720A       | p.G907E       | NA        | 18    | 28    |
| Ad1    | KIR2DL1  | NM_014218    | missense   | c.G16A         | p.V6I         | 4.2e-05   | 29    | 10    |
| Ad1    | MICAL1   | NM_001159291 | missense   | c.T2254G       | p.S752A       | NA        | 13    | 54    |
| Ad1    | MTRNR2L8 | NM_001190702 | missense   | c.C35T         | p.S12L        | NA        | 29    | 38    |
| Ad1    | NCOR2    | NM_001077261 | missense   | c.C6712A       | p.Q2238K      | NA        | 17    | 24    |
| Ad1    | NCOR2    | NM_001077261 | missense   | c.A6711C       | p.E2237D      | NA        | 17    | 24    |
| Ad1    | RFWD2    | NM_001286644 | missense   | c.A329G        | p.N110S       | NA        | 61    | 31    |
| Ad1    | USP15    | NM_006313    | missense   | c.G2723C       | p.S908T       | NA        | 152   | 19    |
| Ad2    | CPT1B    | NM_001145137 | missense   | c.G49A         | p.D17N        | NA        | 21    | 19    |
| Ad2    | CTDSP2   | NM_005730    | missense   | c.C9A          | p.H3Q         | NA        | 9     | 33    |
| Ad2    | DCAF16   | NM_017741    | missense   | c.A457T        | p.S153C       | NA        | 233   | 15    |
| Ad2    | FAM179B  | NM_015091    | missense   | c.T4596G       | p.F1532L      | NA        | 18    | 28    |
| Ad2    | MTRNR2L8 | NM_001190702 | missense   | c.C35T         | p.S12L        | NA        | 24    | 25    |
| Ad2    | ORMDL3   | NM_139280    | missense   | c.A157C        | p.N53H        | NA        | 35    | 20    |
| Ad2    | PEX26    | NM_001127649 | missense   | c.C32T         | p.P11L        | 9.453e-05 | 21    | 43    |
| Ad2    | PRDM11   | NM_001256695 | missense   | c.T284G        | p.F95C        | NA        | 24    | 13    |
| Ad2    | PRKRIP1  | NM_024653    | missense   | c.A308C        | p.Q103P       | NA        | 23    | 26    |
| Ad2    | SLCO5A1  | NM_001146008 | missense   | c.G245C        | p.S82T        | 8.236e-06 | 34    | 29    |
| Ad2    | SOX13    | NM_005686    | missense   | c.G1094T       | p.S365I       | NA        | 112   | 35    |
| Ad2    | TPRX1    | NM_198479    | missense   | c.A643T        | p.I215F       | NA        | 20    | 20    |
| Ad2    | TPSAB1   | NM_003294    | missense   | c.C412T        | p.H138Y       | NA        | 13    | 54    |
| Ad2    | ZNF333   | NM_032433    | frameshift | c.1702_1785del | p.568_595del  | NA        | 229   | 14    |
| Ad3    | BSN      | NM_003458    | missense   | c.A7292T       | p.Q2431L      | NA        | 29    | 10    |
| Ad3    | CCDC79   | NM_001136505 | missense   | c.G1705T       | p.D569Y       | NA        | 12    | 33    |
| Ad3    | CCDC85B  | NM_006848    | missense   | c.G521C        | p.G174A       | NA        | 4     | 75    |
| Ad3    | COLGALT1 | NM_024656    | missense   | c.T1214C       | p.L405P       | NA        | 109   | 10    |
| Ad3    | DNMT3B   | NM_001207056 | missense   | c.T2077C       | p.C693R       | NA        | 155   | 25    |
| Ad3    | DYNLT1   | NM_001291602 | missense   | c.G130A        | p.G44R        | NA        | 135   | 30    |
| Ad3    | EGFL7    | NM_201446    | missense   | c.G622A        | p.D208N       | 0.000009  | 8     | 50    |
| Ad3    | FOLH1    |              | splicing   |                |               | NA        | 19    | 21    |
| Ad3    | GNAS     | NM_000516    | missense   | c.C601T        | p.R201C       | 8.236e-06 | 73    | 27    |
| Ad3    | NFRKB    | NM_006165    | missense   | c.T385C        | p.F129L       | NA        | 35    | 17    |
| Ad3    | PKD2L1   | NM_001253837 | missense   | c.G334A        | p.D112N       | NA        | 17    | 47    |
| Ad3    | POLR3D   | NM_001722    | missense   | c.A421C        | p.K141Q       | NA        | 34    | 18    |
| Ad3    | SAFB     | NM_001201340 | missense   | c.C1985A       | p.A662D       | NA        | 154   | 37    |
| Ad3    | SKIDA1   | NM_207371    | missense   | c.G1286A       | p.G429E       | NA        | 18    | 28    |
| Ad3    | SORL1    | NM_003105    | missense   | c.A4795G       | p.I1599V      | NA        | 207   | 14    |
| Ad3    | SYCP1    | NM_001282542 | missense   | c.C2512A       | p.P838T       | NA        | 47    | 17    |
| Ad3    | SYCP1    | NM_001282542 | missense   | c.C2513A       | p.P838Q       | NA        | 44    | 16    |
| Ad3    | TMEM132D | NM_133448    | missense   | c.C2273T       | p.A758V       | 3.295e-05 | 189   | 24    |
| Ad3    | WDR66    | NM_001178003 | missense   | c.G184A        | p.G62R        | NA        | 23    | 52    |

|     |           |              |            |                |                |           |     |    |
|-----|-----------|--------------|------------|----------------|----------------|-----------|-----|----|
| Ad3 | WDR66     | NM_001178003 | missense   | c.G185A        | p.G62E         | 1.668e-05 | 24  | 58 |
| Ad3 | ZNF695    | NM_020394    | missense   | c.G1421A       | p.G474D        | NA        | 40  | 13 |
| Ad3 | ZNF695    | NM_020394    | missense   | c.G1420A       | p.G474S        | NA        | 38  | 16 |
| Ad3 | ZNF709    | NM_152601    | missense   | c.G1395A       | p.M465I        | NA        | 39  | 10 |
| Ad4 | CCDC84    | NM_198489    | missense   | c.T386C        | p.F129S        | NA        | 34  | 18 |
| Ad4 | CDH9      | NM_016279    | missense   | c.C469G        | p.P157A        | NA        | 13  | 62 |
| Ad4 | CDH9      | NM_016279    | missense   | c.G466C        | p.E156Q        | NA        | 12  | 50 |
| Ad4 | CGN       | NM_020770    | missense   | c.A2597G       | p.K866R        | NA        | 30  | 23 |
| Ad4 | EP300     | NM_001429    | missense   | c.A4391T       | p.Q1464L       | NA        | 211 | 15 |
| Ad4 | EP300     | NM_001429    | missense   | c.A4394G       | p.E1465G       | NA        | 213 | 17 |
| Ad4 | FOXR1     | NM_181721    | missense   | c.G718C        | p.G240R        | NA        | 209 | 22 |
| Ad4 | FOXR1     | NM_181721    | missense   | c.G719C        | p.G240A        | NA        | 197 | 23 |
| Ad4 | MPHOSPH10 | NM_005791    | missense   | c.T1889C       | p.F630S        | NA        | 16  | 31 |
| Ad4 | MTRNR2L8  | NM_001190702 | missense   | c.C35T         | p.S12L         | NA        | 26  | 35 |
| Ad4 | PRKACA    | NM_002730    | missense   | c.T617G        | p.L206R        | NA        | 120 | 23 |
| Ad4 | SLC25A11  | NM_001165418 | missense   | c.T81G         | p.F27L         | NA        | 16  | 38 |
| Ad4 | TLK1      | NM_001136555 | missense   | c.T1842A       | p.F614L        | NA        | 10  | 30 |
| Ad4 | TLK1      | NM_001136555 | missense   | c.T1841A       | p.F614Y        | NA        | 11  | 27 |
| Ad4 | TLK1      | NM_001136555 | missense   | c.T1840A       | p.F614I        | NA        | 11  | 27 |
| Ad4 | ZBTB21    | NM_020727    | missense   | c.A65C         | p.E22A         | NA        | 231 | 23 |
| Ad5 | CDC42EP4  | NM_012121    | missense   | c.C278T        | p.T93I         | NA        | 10  | 30 |
| Ad5 | CFAP97    |              | splicing   |                |                | NA        | 18  | 22 |
| Ad5 | CLASP2    | NM_001207044 | missense   | c.A2295T       | p.R765S        | NA        | 10  | 30 |
| Ad5 | DPF1      | NM_004647    | missense   | c.T856C        | p.S286P        | NA        | 20  | 15 |
| Ad5 | GNAS      | NM_000516    | missense   | c.C601T        | p.R201C        | 8.236e-06 | 61  | 38 |
| Ad5 | IFNGR1    | NM_000416    | missense   | c.T221A        | p.I74N         | NA        | 11  | 27 |
| Ad5 | KIAA0754  | NM_015038    | missense   | c.G3841A       | p.A1281T       | NA        | 8   | 38 |
| Ad5 | LRRRC16B  | NM_138360    | missense   | c.G2939C       | p.R980P        | NA        | 7   | 43 |
| Ad5 | LYPD2     | NM_205545    | frameshift | c.170_178del   | p.57_60del     | NA        | 21  | 24 |
| Ad5 | P3H1      | NM_001146289 | missense   | c.T1355C       | p.L452P        | NA        | 24  | 46 |
| Ad5 | POLR3D    | NM_001722    | missense   | c.A421C        | p.K141Q        | NA        | 20  | 35 |
| Ad5 | PPAPDC3   | NM_032728    | missense   | c.G575C        | p.G192A        | NA        | 16  | 44 |
| Ad5 | RTKN2     | NM_001282941 | nonsense   | c.C283T        | p.R95X         | 8.238e-06 | 76  | 28 |
| Ad5 | SLC25A2   | NM_031947    | missense   | c.C44G         | p.A15G         | NA        | 37  | 24 |
| Ad5 | SLC52A2   | NM_001253815 | missense   | c.A116G        | p.K39R         | 3.296e-05 | 13  | 23 |
| Ad5 | SMARCC2   | NM_003075    | frameshift | c.3579_3617del | p.1193_1206del | NA        | 15  | 33 |
| Ad5 | SRP72     | NM_001267722 | missense   | c.A1487G       | p.K496R        | NA        | 13  | 23 |
| Ad5 | STRN3     | NM_001083893 | missense   | c.A167G        | p.E56G         | NA        | 4   | 75 |
| Ad5 | TNKS1BP1  | NM_033396    | missense   | c.G4337C       | p.R1446P       | NA        | 14  | 21 |
| Ad5 | TXNDC2    | NM_001098529 | missense   | c.C895A        | p.L299I        | 1.648e-05 | 8   | 38 |
| Ad5 | ZNF385D   |              | splicing   |                |                | NA        | 40  | 30 |
| Ad5 | ZNF721    | NM_133474    | missense   | c.C1793T       | p.T598I        | NA        | 22  | 32 |
| Ad5 | ZNF721    | NM_133474    | missense   | c.A1790C       | p.Y597S        | NA        | 24  | 42 |
| Ad5 | ZNF721    | NM_133474    | missense   | c.C1786T       | p.R596W        | 0.0001569 | 24  | 50 |
| Ad5 | ZSCAN25   | NM_145115    | missense   | c.C1339G       | p.Q447E        | NA        | 14  | 29 |
| Ad6 | ATXN7L2   | NM_153340    | missense   | c.C1000T       | p.R334C        | NA        | 216 | 31 |
| Ad6 | CCSER1    | NM_001145065 | missense   | c.G2173T       | p.G725C        | NA        | 20  | 35 |
| Ad6 | CFAP70    | NM_145170    | missense   | c.A431G        | p.Q144R        | NA        | 214 | 30 |
| Ad6 | CPA2      | NM_001869    | missense   | c.T80C         | p.V27A         | NA        | 9   | 33 |
| Ad6 | CRY1      | NM_004075    | missense   | c.G58C         | p.A20P         | NA        | 18  | 28 |
| Ad6 | CTAGE1    | NM_172241    | missense   | c.A1256C       | p.Q419P        | NA        | 34  | 18 |

|     |          |              |            |            |          |           |     |    |
|-----|----------|--------------|------------|------------|----------|-----------|-----|----|
| Ad6 | CTAGE1   | NM_172241    | missense   | c.C1255A   | p.Q419K  | NA        | 33  | 18 |
| Ad6 | CTNNB1   | NM_001098209 | missense   | c.T133C    | p.S45P   | NA        | 207 | 29 |
| Ad6 | ELAC2    | NM_001165962 | missense   | c.A1868G   | p.Y623C  | NA        | 142 | 20 |
| Ad6 | GHRL     | NM_001134944 | missense   | c.G67A     | p.V23I   | 3.926e-05 | 218 | 22 |
| Ad6 | GTF3C1   | NM_001286242 | missense   | c.A1232G   | p.K411R  | 4.942e-05 | 166 | 29 |
| Ad6 | H2AFZ    | NM_002106    | missense   | c.G254A    | p.R85H   | NA        | 77  | 30 |
| Ad6 | LTN1     | NM_015565    | missense   | c.A4268C   | p.E1423A | NA        | 228 | 26 |
| Ad6 | MUC12    | NM_001164462 | missense   | c.C12217T  | p.L4073F | NA        | 17  | 41 |
| Ad6 | NPEPL1   | NM_024663    | missense   | c.C852G    | p.C284W  | NA        | 32  | 38 |
| Ad6 | PBRM1    | NM_018313    | frameshift | c.1334delT | p.L445X  | NA        | 25  | 20 |
| Ad6 | PDE8B    | NM_001029851 | nonsense   | c.C2206T   | p.Q736X  | NA        | 178 | 25 |
| Ad6 | RAD17    |              | splicing   |            |          | NA        | 38  | 16 |
| Ad6 | SGK2     | NM_016276    | missense   | c.A337G    | p.K113E  | NA        | 156 | 28 |
| Ad6 | SLC25A46 |              | splicing   |            |          | NA        | 20  | 30 |
| Ad6 | SLC9A3   | NM_001284351 | missense   | c.G2461A   | p.E821K  | NA        | 13  | 38 |
| Ad6 | SLC9A3   | NM_001284351 | missense   | c.C2459T   | p.P820L  | NA        | 17  | 29 |
| Ad6 | SLC9A3   | NM_001284351 | missense   | c.C2458T   | p.P820S  | NA        | 16  | 31 |
| Ad6 | SUSD4    |              | splicing   |            |          | NA        | 18  | 50 |
| Ad6 | SYN1     | NM_006950    | missense   | c.C1328T   | p.P443L  | NA        | 17  | 41 |
| Ad6 | TMF1     | NM_007114    | missense   | c.A3046G   | p.I1016V | NA        | 38  | 26 |
| Ad6 | TNRC6C   | NM_001142640 | missense   | c.G1288T   | p.G430W  | NA        | 120 | 33 |
| Ad6 | TPST2    | NM_001008566 | missense   | c.G750T    | p.K250N  | NA        | 199 | 36 |
| Ad6 | USP25    | NM_001283041 | missense   | c.T1088G   | p.F363C  | NA        | 38  | 47 |
| Ad6 | XIRP1    | NM_001198621 | missense   | c.A893T    | p.E298V  | NA        | 107 | 34 |
| Ad6 | ZFR      | NM_016107    | missense   | c.G196T    | p.V66F   | NA        | 54  | 35 |

**Supplemental table 2: *PRKACB* primers**

| <b>Exons</b>   | <b>Primers sequence: forward (above), reverse (below)</b> | <b>PCR product size</b> | <b>annealing temperature</b> |
|----------------|-----------------------------------------------------------|-------------------------|------------------------------|
| <b>Exon 1</b>  | GAAGATACAGTCGGGCCAGG<br>CCTCAGAAGCTGCGACCC                | 476                     | 63                           |
| <b>Exon 2</b>  | TCCTTACACCTGAAAACAGCTC<br>AGTATAACTATGGCAAATTTCCC         | 669                     | 58                           |
| <b>Exon 3</b>  | AGCATTTATAATTTCCCATAGTGTT<br>CCCTGAAGGTAAATAACAACAA       | 226                     | 56                           |
| <b>Exon 4</b>  | ACCGCAATTACTTATGCACCA<br>TCTTCAGGCTTATCATCTGGT            | 368                     | 56                           |
| <b>Exon 5</b>  | TCCCAGACTAGTTTGTGGCA<br>TCTGGTTAAACAACACAAGCA             | 350                     | 58                           |
| <b>Exon 6</b>  | TCCCCATAAATTTATCAGAGCGT<br>AACAAGTTCCTTTCATAACAGGA        | 517                     | 60                           |
| <b>Exon 7</b>  | CTTTTCTTTGAGTTGAGGAAGGA<br>AGGGATGCATGTCTCATATTTCT        | 361                     | 60                           |
| <b>Exon 8</b>  | TCTGTCCTGAATAGCTGCTCA<br>CAGAAATTGCTTTACTGTTTTGT          | 481                     | 56                           |
| <b>Exon 9</b>  | TCATGAGTCTTAGAATGTGTGTTT<br>AAGTTGAAAATATCTCCACCACA       | 290                     | 56                           |
| <b>Exon 10</b> | GCTAACCTACTGCTTGCTG<br>CTGCTTCAACAAGGACGGTC               | 384                     | 60                           |
